# Supplementary material for: Self-Powered Detection of Glucose by Enzymatic Glucose/Oxygen Fuel Cells on Printed Circuit Boards
Source: PubMed Central journal article supplement (PMC8735749; doi:10.1021/acsami.1c02747), 2021-05-26
Supplement: am1c02747_si_001.pdf [file am1c02747_si_001.pdf]

## Supporting Information

# Self-powered Detection of Glucose by Enzymatic Glucose/Oxygen Fuel Cells on Printed Circuit Boards

*Carla Gonzalez-Solino<sup>1,2</sup>, Elena Bernalte<sup>1,2†</sup>, Clara Bayona Royo<sup>1,2</sup>, Richard*

*Bennett<sup>3††</sup>, Dónal Leech<sup>3</sup> and Mirella Di Lorenzo<sup>1,2\*</sup>*

<sup>1</sup>Department of Chemical Engineering, University of Bath, Bath BA2 7AY, UK

<sup>2</sup>Centre for Biosensors, Bioelectronics and Biodevices (C3Bio), University of Bath,

Bath BA2 7AY, UK

<sup>3</sup>School of Chemistry & Ryan Institute, National University of Ireland Galway,

University Road, Galway, H91 TK33, Ireland

\*Corresponding author: [mdl28@bath.ac.uk](mailto:mdl28@bath.ac.uk)

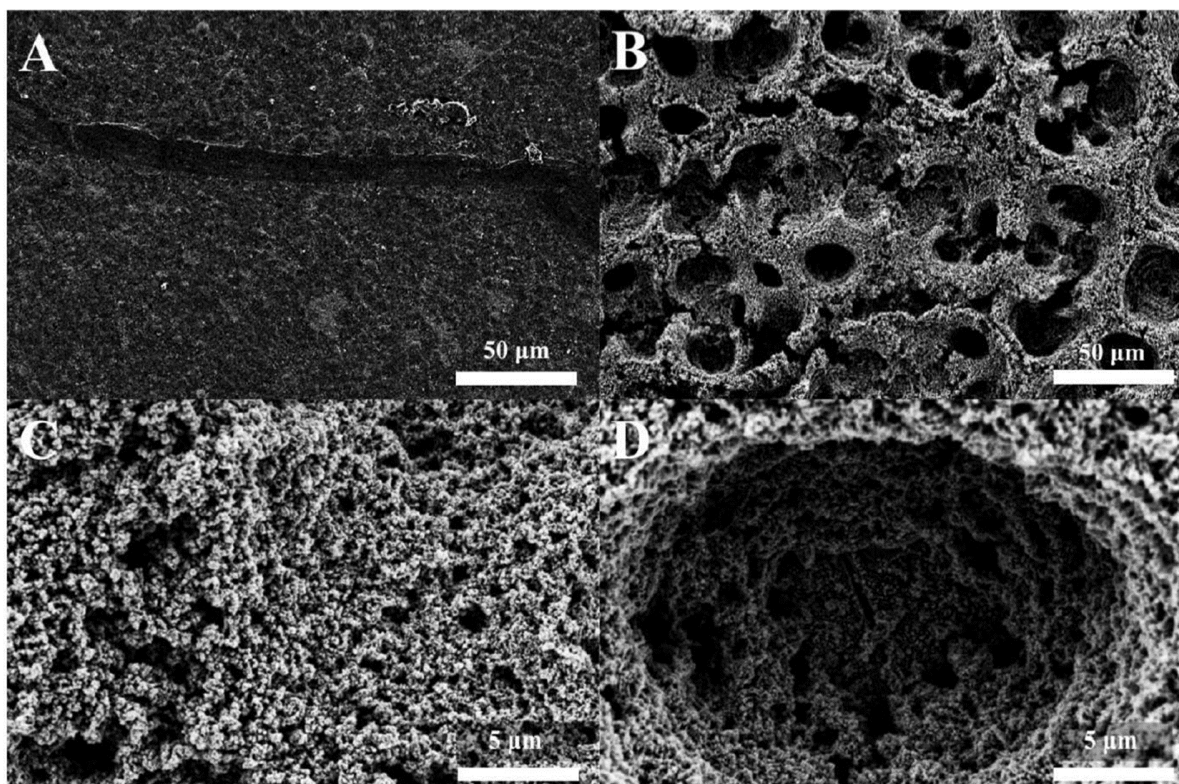

**Figure S1.** SEM images. (A) Au electrode on PCB at 500X magnification. (B) hPG/Au at 500X magnification. (C,D) hPG/Au electrode at 5k magnification.

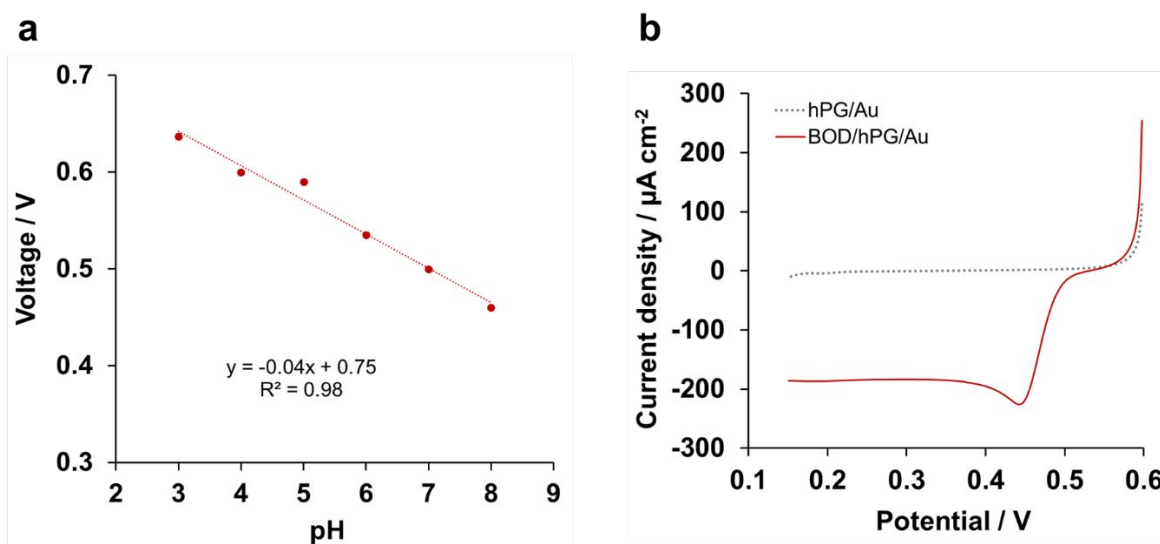

**Figure S2.** Characterisation of the biocathode BOD/hPG/Au: a) effect of pH on the ORR and b) ORR at the hPG electrodes with and without BOD.

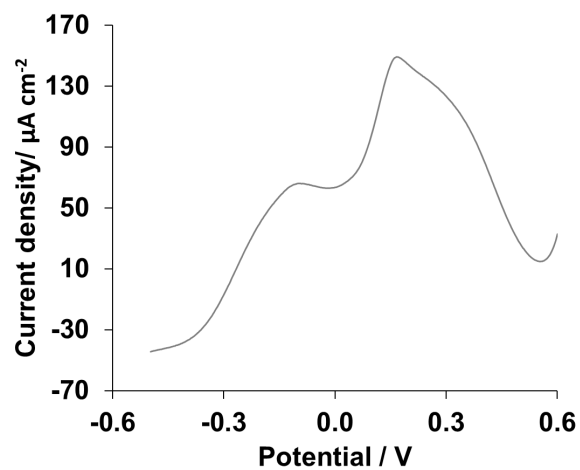

**Figure S3.** I-V response of the hPG/Au electrode in the presence of 6 mM glucose in phosphate buffer pH 7.4. Potentials referred to Ag/AgCl. Scan rate 5 mV s<sup>-1</sup>.

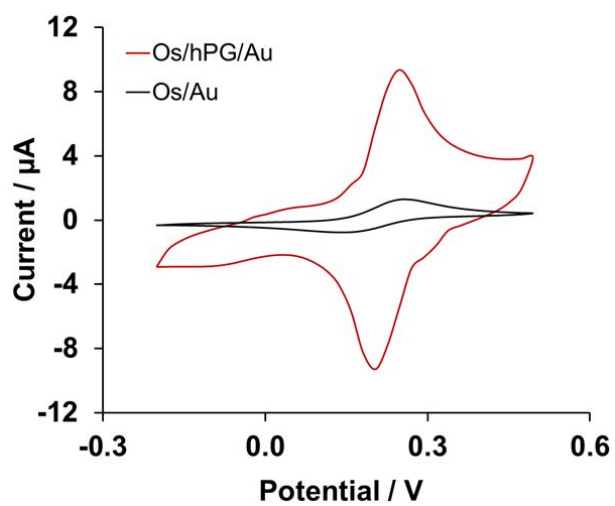

**Figure S4.** Comparison of Os/hPG/Au and Os/Au electrodes in phosphate buffer at a scan rate of  $10 \text{ mV s}^{-1}$ .
